# Supplementary material for: Molecular characterization of exosome-like vesicles from breast cancer cells
Source: PubMed Central journal article supplement (PMC3936808; doi:10.1186/1471-2407-14-44), 2014-01-27
Supplement: 1471-2407-14-44-S2.pdf [file 1471-2407-14-44-S2.pdf]

Supplementary Table 2: List of proteins exclusively identified in MDA-Exo.

**ACTB\_HUMAN** Mass: 41736 **Score: 1424** Matches: 53(49) Sequences: 12(12) emPAI: 5.33

Actin, cytoplasmic 1 OS=Homo sapiens GN=ACTB PE=1 SV=1

| Query | Score | Peptide                                      |
|-------|-------|----------------------------------------------|
| 364   | 47    | R.DLTDYLMK.I                                 |
| 395   | -46   | R.DLTDYLMK.I + Oxidation (M)                 |
| 528   | -45   | R.GYSFTTTAER.E                               |
| 529   | 74    | R.GYSFTTTAER.E                               |
| 530   | -49   | R.GYSFTTTAER.E                               |
| 531   | -74   | R.GYSFTTTAER.E                               |
| 532   | -46   | R.GYSFTTTAER.E                               |
| 533   | -48   | R.GYSFTTTAER.E                               |
| 534   | -51   | R.GYSFTTTAER.E                               |
| 536   | -35   | R.GYSFTTTAER.E                               |
| 537   | -54   | R.GYSFTTTAER.E                               |
| 538   | -37   | R.GYSFTTTAER.E                               |
| 539   | -50   | R.GYSFTTTAER.E                               |
| 540   | -49   | R.GYSFTTTAER.E                               |
| 541   | -36   | R.GYSFTTTAER.E                               |
| 542   | -71   | R.GYSFTTTAER.E                               |
| 592   | -52   | K.EITALAPSTMK.I                              |
| 593   | 81    | K.EITALAPSTMK.I                              |
| 594   | -39   | K.EITALAPSTMK.I                              |
| 595   | -42   | K.EITALAPSTMK.I                              |
| 610   | -47   | R.HQGVMVGMGQK.D                              |
| 611   | 48    | R.HQGVMVGMGQK.D                              |
| 612   | -35   | R.HQGVMVGMGQK.D                              |
| 629   | -60   | K.EITALAPSTMK.I + Oxidation (M)              |
| 630   | -43   | K.EITALAPSTMK.I + Oxidation (M)              |
| 631   | -40   | K.EITALAPSTMK.I + Oxidation (M)              |
| 654   | 48    | R.AVFPSIVGRPR.H                              |
| 983   | -56   | K.QEYDESGPSIVHR.K + Gln->pyro-Glu (N-term Q) |
| 1001  | 44    | K.IWHHTFYNELR.V                              |
| 1003  | -40   | K.IWHHTFYNELR.V                              |
| 1004  | -52   | K.QEYDESGPSIVHR.K                            |
| 1008  | 57    | K.QEYDESGPSIVHR.K                            |
| 1010  | -45   | K.QEYDESGPSIVHR.K                            |
| 1015  | -44   | K.QEYDESGPSIVHR.K                            |
| 1362  | -99   | K.SYELPDGQVITIGNER.F                         |
| 1363  | 118   | K.SYELPDGQVITIGNER.F                         |
| 1364  | -109  | K.SYELPDGQVITIGNER.F                         |
| 1365  | -72   | K.SYELPDGQVITIGNER.F                         |
| 1366  | -63   | K.SYELPDGQVITIGNER.F                         |
| 1367  | -89   | K.SYELPDGQVITIGNER.F                         |
| 1368  | -83   | K.SYELPDGQVITIGNER.F                         |
| 1537  | -64   | R.VAPEEHPVLLTEAPLNPK.A                       |
| 1538  | 93    | R.VAPEEHPVLLTEAPLNPK.A                       |
| 1539  | -52   | R.VAPEEHPVLLTEAPLNPK.A                       |
| 1542  | -65   | R.VAPEEHPVLLTEAPLNPK.A                       |
| 1545  | -42   | R.VAPEEHPVLLTEAPLNPK.A                       |
| 1547  | -50   | R.VAPEEHPVLLTEAPLNPK.A                       |
| 1734  | -104  | K.DLYANTVLSGGTTMYPGIADR.M                    |

|      |     |                                           |
|------|-----|-------------------------------------------|
| 1746 | 117 | K.DLYANTVLSGGTTMYPGIADR.M + Oxidation (M) |
| 1780 | 134 | R.KDLYANTVLSGGTTMYPGIADR.M                |
| 1781 | -81 | R.KDLYANTVLSGGTTMYPGIADR.M                |
| 1895 | 102 | R.TTGIVMDSGDGVTHTVPIYEGYALPHAILR.L        |
| 1896 | -52 | R.TTGIVMDSGDGVTHTVPIYEGYALPHAILR.L        |

**ACTC\_HUMAN** Mass: 42019 **Score: 644** Matches: 26(25) Sequences: 7(7) emPAI: 1.62

Actin, alpha cardiac muscle 1 OS=Homo sapiens GN=ACTC1 PE=1 SV=1

| Query | Score | Peptide                              |
|-------|-------|--------------------------------------|
| 364   | 47    | R.DLTDYLMK.I                         |
| 395   | -46   | R.DLTDYLMK.I + Oxidation (M)         |
| 592   | -52   | K.EITALAPSTMK.I                      |
| 593   | 81    | K.EITALAPSTMK.I                      |
| 594   | -39   | K.EITALAPSTMK.I                      |
| 595   | -42   | K.EITALAPSTMK.I                      |
| 610   | -47   | R.HQGVMVGMGQK.D                      |
| 611   | 48    | R.HQGVMVGMGQK.D                      |
| 612   | -35   | R.HQGVMVGMGQK.D                      |
| 629   | -60   | K.EITALAPSTMK.I + Oxidation (M)      |
| 630   | -43   | K.EITALAPSTMK.I + Oxidation (M)      |
| 631   | -40   | K.EITALAPSTMK.I + Oxidation (M)      |
| 654   | 48    | R.AVFPSIVGRPR.H                      |
| 1001  | 44    | K.IWHHTFYNELR.V                      |
| 1003  | -40   | K.IWHHTFYNELR.V                      |
| 1362  | -99   | K.SYELPDGQVITIGNER.F                 |
| 1363  | 118   | K.SYELPDGQVITIGNER.F                 |
| 1364  | -109  | K.SYELPDGQVITIGNER.F                 |
| 1365  | -72   | K.SYELPDGQVITIGNER.F                 |
| 1366  | -63   | K.SYELPDGQVITIGNER.F                 |
| 1367  | -89   | K.SYELPDGQVITIGNER.F                 |
| 1368  | -83   | K.SYELPDGQVITIGNER.F                 |
| 1561  | -41   | K.YPIEHGIITNWDDMEK.I                 |
| 1562  | 63    | K.YPIEHGIITNWDDMEK.I                 |
| 1563  | -44   | K.YPIEHGIITNWDDMEK.I                 |
| 1589  | -50   | K.YPIEHGIITNWDDMEK.I + Oxidation (M) |

**TBB2C\_HUMAN** Mass: 49830 **Score: 381** Matches: 10(10) Sequences: 7(7) emPAI: 1.08

Tubulin beta-2C chain OS=Homo sapiens GN=TUBB2C PE=1 SV=1

| Query | Score | Peptide                                  |
|-------|-------|------------------------------------------|
| 556   | 65    | K.LAVNMVPPFR.L                           |
| 839   | -83   | R.IMNTFSVVPSPK.V                         |
| 845   | 91    | R.IMNTFSVVPSPK.V                         |
| 872   | -46   | R.IMNTFSVVPSPK.V + Oxidation (M)         |
| 954   | 75    | K.EVDEQMLNVQNK.N                         |
| 960   | -63   | K.EVDEQMLNVQNK.N + Oxidation (M)         |
| 1129  | 77    | R.AVLVDLEPGTMDSVR.S                      |
| 1204  | 92    | R.ALTVPELTQQMFDAK.N                      |
| 1209  | 74    | K.NSSYFVEWIPNNVK.T                       |
| 1720  | 53    | R.GRMSMKEVDEQMLNVQNK.N + 2 Oxidation (M) |

**HSP71\_HUMAN** Mass: 70051 **Score: 284** Matches: 9(8) Sequences: 7(7) emPAI: 0.50

Heat shock 70 kDa protein 1A/1B OS=Homo sapiens GN=HSPA1A PE=1 SV=5

| Query | Score | Peptide              |
|-------|-------|----------------------|
| 653   | 47    | K.DAGVIAGLNVL.R      |
| 697   | 44    | K.FGDPVVQSDMK.H      |
| 700   | -36   | K.VEIIANDQG.NR.T     |
| 701   | -41   | K.VEIIANDQG.NR.T     |
| 703   | 44    | K.VEIIANDQG.NR.T     |
| 976   | 103   | R.TTPSYVAFTDTER.L    |
| 1174  | 93    | K.NQVALNPQNTVFDAK.R  |
| 1186  | 78    | K.ATAGDTHLGGEDFDNR.L |
| 1199  | 88    | R.IINEPTAAAIAYGLDR.T |

**TBB3\_HUMAN** Mass: 50432 **Score: 279** Matches: 7(7) Sequences: 5(5) emPAI: 0.62  
Tubulin beta-3 chain OS=Homo sapiens GN=TUBB3 PE=1 SV=2

| Query | Score | Peptide                          |
|-------|-------|----------------------------------|
| 556   | 65    | K.LAVNMVPPFR.L                   |
| 839   | -83   | R.IMNTFSVVPSPK.V                 |
| 845   | 91    | R.IMNTFSVVPSPK.V                 |
| 872   | -46   | R.IMNTFSVVPSPK.V + Oxidation (M) |
| 925   | 55    | K.EVDEQMLAIQSK.N                 |
| 1204  | 92    | R.ALTVPELTQQMFDK.N               |
| 1209  | 74    | K.NSSYFVEWIPNNVK.V               |

**CLH1\_HUMAN** Mass: 191612 **Score: 195** Matches: 7(7) Sequences: 7(7) emPAI: 0.16  
Clathrin heavy chain 1 OS=Homo sapiens GN=CLTC PE=1 SV=5

| Query | Score | Peptide                       |
|-------|-------|-------------------------------|
| 720   | 47    | K.TLQIFNIEMK.S                |
| 880   | 42    | R.VVGAMQLYSVDR.K              |
| 1085  | 72    | R.RPISADSAIMNPASK.V           |
| 1245  | 84    | K.VSQPIEGHAASFAQFK.M          |
| 1529  | 69    | K.LHIIIEVGTPTGNQPFPK.K        |
| 1779  | 55    | R.RPISADSAIMNPASKVIALKAGK.T   |
| 1859  | 41    | K.ADDPSSYMEVVQAANTSGNWEELVK.Y |

**UGDH\_HUMAN** Mass: 55023 **Score: 176** Matches: 5(5) Sequences: 5(5) emPAI: 0.45  
UDP-glucose 6-dehydrogenase OS=Homo sapiens GN=UGDH PE=1 SV=1

| Query | Score | Peptide               |
|-------|-------|-----------------------|
| 471   | 79    | K.LAANAFLAQR.I        |
| 510   | 39    | R.VTVVDVNESR.I        |
| 914   | 43    | R.VLIGGETPEGQR.A      |
| 971   | 86    | K.ILTTNTWSELSK.L      |
| 1500  | 73    | R.INAWNSPTLPIYEPGLK.E |

**K2C8\_HUMAN** Mass: 53704 **Score: 149** Matches: 7(7) Sequences: 7(7) emPAI: 0.70  
Keratin, type II cytoskeletal 8 OS=Homo sapiens GN=KRT8 PE=1 SV=7

| Query | Score | Peptide         |
|-------|-------|-----------------|
| 366   | 53    | R.LQAEIEGLK.G   |
| 475   | 39    | R.QLYEEEIR.E    |
| 580   | 39    | R.EYQELMNK.L    |
| 619   | 49    | K.LVSESSDVLPK.- |

|     |    |                   |
|-----|----|-------------------|
| 893 | 57 | R.ASLEAAIADAEQR.G |
| 897 | 67 | R.TEMENEFVLIK.K   |
| 940 | 69 | R.LEGLTDEINFLR.Q  |

**H2B1C\_HUMAN** Mass: 13906 **Score: 139** Matches: 5(3) Sequences: 4(3) emPAI: 2.10  
Histone H2B type 1-C/E/F/G/I OS=Homo sapiens GN=HIST1H2BC PE=1 SV=4

| Query | Score | Peptide                                    |
|-------|-------|--------------------------------------------|
| 545   | 36    | K.ESYSVYVYK.V                              |
| 573   | 50    | K.QVHPDTGISSK.A + Gln->pyro-Glu (N-term Q) |
| 578   | -35   | K.QVHPDTGISSK.A + Gln->pyro-Glu (N-term Q) |
| 757   | 62    | R.KESYSVYVYK.V                             |
| 1350  | 96    | K.AMGIMNSFVNDIFER.I + 2 Oxidation (M)      |

**AT1A3\_HUMAN** Mass: 111747 **Score: 125** Matches: 5(5) Sequences: 5(5) emPAI: 0.20  
Sodium/potassium-transporting ATPase subunit alpha-3 OS=Homo sapiens GN=ATP1A3 PE=1 SV=3

| Query | Score | Peptide                     |
|-------|-------|-----------------------------|
| 719   | 50    | R.LNIPVSQVNPR.D             |
| 922   | 48    | K.VIMVTGDHPITAK.A           |
| 1140  | 69    | K.VDNSSLTGESEPQTR.S         |
| 1421  | 53    | K.GVGIISEGNETVEDIAAR.L      |
| 1798  | 53    | R.IISAHGCKVDNSSLTGESEPQTR.S |

**EPCAM\_HUMAN** Mass: 34932 **Score: 118** Matches: 1(1) Sequences: 1(1) emPAI: 0.12  
Epithelial cell adhesion molecule OS=Homo sapiens GN=EPCAM PE=1 SV=2

| Query | Score | Peptide              |
|-------|-------|----------------------|
| 1489  | 118   | K.TQNDVDIADVAYYFEK.D |

**STOM\_HUMAN** Mass: 31730 **Score: 115** Matches: 1(1) Sequences: 1(1) emPAI: 0.14  
Erythrocyte band 7 integral membrane protein OS=Homo sapiens GN=STOM PE=1 SV=3

| Query | Score | Peptide                 |
|-------|-------|-------------------------|
| 1514  | 115   | R.VQNATLAVANITNADSATR.L |

**4F2\_HUMAN** Mass: 67993 **Score: 109** Matches: 3(2) Sequences: 3(2) emPAI: 0.13  
4F2 cell-surface antigen heavy chain OS=Homo sapiens GN=SLC3A2 PE=1 SV=3

| Query | Score | Peptide             |
|-------|-------|---------------------|
| 607   | 37    | K.ADLLLSTQPGR.E     |
| 977   | 70    | K.IKVAEDEAEAAAAAK.F |
| 991   | 70    | K.GQSEDPGSLLSLFR.R  |

**GNAI3\_HUMAN** Mass: 40532 **Score: 109** Matches: 4(4) Sequences: 4(4) emPAI: 0.49  
Guanine nucleotide-binding protein G(k) subunit alpha OS=Homo sapiens GN=GNAI3 PE=1 SV=3

| Query | Score | Peptide               |
|-------|-------|-----------------------|
| 447   | 69    | K.LLLL GAGESGK.S      |
| 921   | 57    | K.TTGIVETHFTFK.D      |
| 1100  | 40    | K.LLLL GAGESGKSTIVK.Q |
| 1325  | 52    | R.ISQSNIPTQQDVL.R     |

**ALDOA\_HUMAN** Mass: 39420 **Score: 104** Matches: 2(2) Sequences: 2(2) emPAI: 0.23

Fructose-bisphosphate aldolase A OS=Homo sapiens GN=ALDOA PE=1 SV=2

| Query | Score | Peptide           |
|-------|-------|-------------------|
| 870   | 85    | K.GILAADESTGSIK.R |
| 947   | 54    | M.PYQYPALTPEQK.K  |

**RS3\_HUMAN** Mass: 26688 **Score: 104** Matches: 1(1) Sequences: 1(1) emPAI: 0.16  
40S ribosomal protein S3 OS=Homo sapiens GN=RPS3 PE=1 SV=2

| Query | Score | Peptide           |
|-------|-------|-------------------|
| 943   | 104   | R.ELAEDGYSGVEVR.V |

**RS8\_HUMAN** Mass: 24205 **Score: 103** Matches: 2(2) Sequences: 2(2) emPAI: 0.39  
40S ribosomal protein S8 OS=Homo sapiens GN=RPS8 PE=1 SV=2

| Query | Score | Peptide            |
|-------|-------|--------------------|
| 827   | 54    | K.LTPEEEEILNK.K    |
| 1251  | 87    | R.IIDVVYNASNELVR.T |

**RAI3\_HUMAN** Mass: 40251 **Score: 100** Matches: 1(1) Sequences: 1(1) emPAI: 0.11  
Retinoic acid-induced protein 3 OS=Homo sapiens GN=GPRC5A PE=1 SV=2

| Query | Score | Peptide           |
|-------|-------|-------------------|
| 946   | 100   | R.TNVNVFSELSAPR.R |

**HSPB1\_HUMAN** Mass: 22782 **Score: 99** Matches: 3(2) Sequences: 3(2) emPAI: 0.42  
Heat shock protein beta-1 OS=Homo sapiens GN=HSPB1 PE=1 SV=2

| Query | Score | Peptide                                   |
|-------|-------|-------------------------------------------|
| 448   | 36    | R.QLSSGVSEIR.H + Gln->pyro-Glu (N-term Q) |
| 596   | 66    | R.LFDQAFGLPR.L                            |
| 1496  | 71    | K.LATQSNEITIPVTFESR.A                     |

**K2C1\_HUMAN** Mass: 66038 **Score: 95** Matches: 2(2) Sequences: 2(2) emPAI: 0.13  
Keratin, type II cytoskeletal 1 OS=Homo sapiens GN=KRT1 PE=1 SV=6

| Query | Score | Peptide          |
|-------|-------|------------------|
| 758   | 43    | R.TNAENEFVTIK.K  |
| 964   | 90    | R.FLEQQNQVLQTK.W |

**GNAS1\_HUMAN** Mass: 111023 **Score: 90** Matches: 3(3) Sequences: 3(3) emPAI: 0.12  
Guanine nucleotide-binding protein G(s) subunit alpha isoforms XLas OS=Homo sapiens  
GN=GNAS PE=1 SV=2

| Query | Score | Peptide              |
|-------|-------|----------------------|
| 447   | 69    | R.LLLLGAGESGK.S      |
| 1100  | 40    | R.LLLLGAGESGKSTIVK.Q |
| 1349  | 48    | R.YTTPEDATPEPGEDPR.V |

**PPIA\_HUMAN** Mass: 18012 **Score: 89** Matches: 2(2) Sequences: 2(2) emPAI: 0.55  
Peptidyl-prolyl cis-trans isomerase A OS=Homo sapiens GN=PPIA PE=1 SV=2

| Query | Score | Peptide           |
|-------|-------|-------------------|
| 581   | 39    | K.FEDENFILK.H     |
| 992   | 87    | K.VKEGMNIVEAMER.F |

**UBA1\_HUMAN** Mass: 117848 **Score: 86** Matches: 2(2) Sequences: 2(2) emPAI: 0.07  
Ubiquitin-like modifier-activating enzyme 1 OS=Homo sapiens GN=UBA1 PE=1 SV=3

| Query | Score | Peptide                |
|-------|-------|------------------------|
| 731   | 45    | R.KPLLESGTLGTK.G       |
| 1484  | 78    | R.NEEDAAELVALAQAVNAR.A |

**RSSA\_HUMAN** Mass: 32854 **Score: 85** Matches: 1(1) Sequences: 1(1) emPAI: 0.13  
40S ribosomal protein SA OS=Homo sapiens GN=RPSA PE=1 SV=4

| Query | Score | Peptide           |
|-------|-------|-------------------|
| 671   | 85    | K.FAAATGATPIAGR.F |

**NDKA\_HUMAN** Mass: 17149 **Score: 83** Matches: 1(1) Sequences: 1(1) emPAI: 0.26  
Nucleoside diphosphate kinase A OS=Homo sapiens GN=NME1 PE=1 SV=1

| Query | Score | Peptide               |
|-------|-------|-----------------------|
| 1355  | 83    | R.VMLGETNPADSKPGTIR.G |

**HNRPK\_HUMAN** Mass: 50976 **Score: 82** Matches: 1(1) Sequences: 1(1) emPAI: 0.08  
Heterogeneous nuclear ribonucleoprotein K OS=Homo sapiens GN=HNRNPK PE=1 SV=1

| Query | Score | Peptide              |
|-------|-------|----------------------|
| 1352  | 82    | R.TDYNASVSPDSSGPER.I |

**ARF1\_HUMAN** Mass: 20697 **Score: 82** Matches: 1(1) Sequences: 1(1) emPAI: 0.21  
ADP-ribosylation factor 1 OS=Homo sapiens GN=ARF1 PE=1 SV=2

| Query | Score | Peptide             |
|-------|-------|---------------------|
| 1152  | 82    | K.QDLPNAMNAAEITDK.L |

**RL7A\_HUMAN** Mass: 29995 **Score: 78** Matches: 1(1) Sequences: 1(1) emPAI: 0.14  
60S ribosomal protein L7a OS=Homo sapiens GN=RPL7A PE=1 SV=2

| Query | Score | Peptide           |
|-------|-------|-------------------|
| 894   | 78    | R.AGVNTVTTLVENK.K |

**K1C18\_HUMAN** Mass: 48057 **Score: 73** Matches: 1(1) Sequences: 1(1) emPAI: 0.09  
Keratin, type I cytoskeletal 18 OS=Homo sapiens GN=KRT18 PE=1 SV=2

| Query | Score | Peptide          |
|-------|-------|------------------|
| 941   | 73    | R.QAQEYEALLNIK.V |

**RAN\_HUMAN** Mass: 24423 **Score: 71** Matches: 2(2) Sequences: 2(2) emPAI: 0.39  
GTP-binding nuclear protein Ran OS=Homo sapiens GN=RAN PE=1 SV=3

| Query | Score | Peptide         |
|-------|-------|-----------------|
| 686   | 51    | K.NLQYYDISAK.S  |
| 780   | 57    | K.FNVWDTAGQEK.F |

**AAAT\_HUMAN** Mass: 56598 **Score: 70** Matches: 2(2) Sequences: 2(2) emPAI: 0.15  
Neutral amino acid transporter B(0) OS=Homo sapiens GN=SLC1A5 PE=1 SV=2

| Query | Score | Peptide |
|-------|-------|---------|
|-------|-------|---------|

557 55 R.STEPELIQVK.S  
1717 51 K.SELPLDPLVPTEEGNPLLK.H

**RS2\_HUMAN** Mass: 31324 **Score: 70** Matches: 2(1) Sequences: 2(1) emPAI: 0.14  
40S ribosomal protein S2 OS=Homo sapiens GN=RPS2 PE=1 SV=2

| Query | Score | Peptide          |
|-------|-------|------------------|
| 414   | 36    | R.GTGIVSAPVVK.K  |
| 961   | 70    | K.SPYQEFTDHLVK.T |

**LAT1\_HUMAN** Mass: 55010 **Score: 69** Matches: 1(1) Sequences: 1(1) emPAI: 0.08  
Large neutral amino acids transporter small subunit 1 OS=Homo sapiens GN=SLC7A5 PE=1 SV=2

| Query | Score | Peptide                |
|-------|-------|------------------------|
| 1226  | 69    | K.SADGSAPAGEGEGVTLQR.N |

**RAB1A\_HUMAN** Mass: 22677 **Score: 68** Matches: 1(1) Sequences: 1(1) emPAI: 0.19  
Ras-related protein Rab-1A OS=Homo sapiens GN=RAB1A PE=1 SV=3

| Query | Score | Peptide         |
|-------|-------|-----------------|
| 830   | 68    | K.LQIWDTAGQER.F |

**RS26\_HUMAN** Mass: 13015 **Score: 68** Matches: 1(1) Sequences: 1(1) emPAI: 0.35  
40S ribosomal protein S26 OS=Homo sapiens GN=RPS26 PE=1 SV=3

| Query | Score | Peptide             |
|-------|-------|---------------------|
| 1171  | 68    | R.DISEASVFDAYVLPK.L |

**RS24\_HUMAN** Mass: 15423 **Score: 65** Matches: 1(1) Sequences: 1(1) emPAI: 0.29  
40S ribosomal protein S24 OS=Homo sapiens GN=RPS24 PE=1 SV=1

| Query | Score | Peptide              |
|-------|-------|----------------------|
| 1195  | 65    | K.TTGFGMIYDSL DYAK.K |

**1A01\_HUMAN** Mass: 40845 **Score: 64** Matches: 1(1) Sequences: 1(1) emPAI: 0.10  
HLA class I histocompatibility antigen, A-1 alpha chain OS=Homo sapiens GN=HLA-A PE=1 SV=1

| Query | Score | Peptide                      |
|-------|-------|------------------------------|
| 1837  | 64    | R.DGEDQTQDTEL VETRPAGDGFQK.W |

**CLIC1\_HUMAN** Mass: 26922 **Score: 59** Matches: 1(1) Sequences: 1(1) emPAI: 0.16  
Chloride intracellular channel protein 1 OS=Homo sapiens GN=CLIC1 PE=1 SV=4

| Query | Score | Peptide          |
|-------|-------|------------------|
| 769   | 59    | K.GVTFNVTTVDTK.R |

**K6PP\_HUMAN** Mass: 85595 **Score: 57** Matches: 1(1) Sequences: 1(1) emPAI: 0.05  
6-phosphofructokinase type C OS=Homo sapiens GN=PFKP PE=1 SV=2

| Query | Score | Peptide          |
|-------|-------|------------------|
| 939   | 57    | R.DLQSNVEHLTEK.M |

**RS6\_HUMAN** Mass: 28680 **Score: 55** Matches: 1(1) Sequences: 1(1) emPAI: 0.15  
40S ribosomal protein S6 OS=Homo sapiens GN=RPS6 PE=1 SV=1

| Query | Score | Peptide          |
|-------|-------|------------------|
| 770   | 55    | K.DIPGLTDTTVPR.R |

**LEG3\_HUMAN** Mass: 26152 **Score: 54** Matches: 1(1) Sequences: 1(1) emPAI: 0.17  
Galectin-3 OS=Homo sapiens GN=LGALS3 PE=1 SV=5

| Query | Score | Peptide         |
|-------|-------|-----------------|
| 761   | 54    | R.GNDVAFHFNPR.F |

**ANXA6\_HUMAN** Mass: 75872 **Score: 52** Matches: 2(2) Sequences: 2(2) emPAI: 0.11  
Annexin A6 OS=Homo sapiens GN=ANXA6 PE=1 SV=3

| Query | Score | Peptide                       |
|-------|-------|-------------------------------|
| 501   | 41    | R.SELDMLDIR.E + Oxidation (M) |
| 626   | 49    | R.DAFVAIVQSVK.N               |

**RL17\_HUMAN** Mass: 21397 **Score: 51** Matches: 1(1) Sequences: 1(1) emPAI: 0.20  
60S ribosomal protein L17 OS=Homo sapiens GN=RPL17 PE=1 SV=3

| Query | Score | Peptide            |
|-------|-------|--------------------|
| 1145  | 51    | K.EQIVPKPEEEVAQK.K |

**RL3\_HUMAN** Mass: 46108 **Score: 50** Matches: 1(1) Sequences: 1(1) emPAI: 0.09  
60S ribosomal protein L3 OS=Homo sapiens GN=RPL3 PE=1 SV=2

| Query | Score | Peptide          |
|-------|-------|------------------|
| 890   | 50    | K.NNASTDYDLSDK.S |

**MUC1\_HUMAN** Mass: 122101 **Score: 49** Matches: 1(1) Sequences: 1(1) emPAI: 0.03  
Mucin-1 OS=Homo sapiens GN=MUC1 PE=1 SV=3

| Query | Score | Peptide         |
|-------|-------|-----------------|
| 779   | 49    | K.NYGQLDIFPAR.D |

**PUR9\_HUMAN** Mass: 64615 **Score: 49** Matches: 1(1) Sequences: 1(1) emPAI: 0.07  
Bifunctional purine biosynthesis protein PURH OS=Homo sapiens GN=ATIC PE=1 SV=3

| Query | Score | Peptide             |
|-------|-------|---------------------|
| 1130  | 49    | R.DVSELTGFPEMLGGR.V |

**RS16\_HUMAN** Mass: 16445 **Score: 49** Matches: 1(1) Sequences: 1(1) emPAI: 0.27  
40S ribosomal protein S16 OS=Homo sapiens GN=RPS16 PE=1 SV=2

| Query | Score | Peptide        |
|-------|-------|----------------|
| 495   | 49    | K.LLEPVLLLGK.E |

**DDX5\_HUMAN** Mass: 69147 **Score: 47** Matches: 1(1) Sequences: 1(1) emPAI: 0.06  
Probable ATP-dependent RNA helicase DDX5 OS=Homo sapiens GN=DDX5 PE=1 SV=1

| Query | Score | Peptide          |
|-------|-------|------------------|
| 699   | 47    | K.APILIATDVASR.G |



**K1C19\_HUMAN** Mass: 44105 **Score: 46** Matches: 1(1) Sequences: 1(1) emPAI: 0.10  
Keratin, type I cytoskeletal 19 OS=Homo sapiens GN=KRT19 PE=1 SV=4

| Query | Score | Peptide          |
|-------|-------|------------------|
| 730   | 46    | R.ALEAANGELEVK.I |

**PSD1\_HUMAN** Mass: 109541 **Score: 45** Matches: 1(1) Sequences: 1(1) emPAI: 0.04  
PH and SEC7 domain-containing protein 1 OS=Homo sapiens GN=PSD PE=2 SV=2

| Query | Score | Peptide          |
|-------|-------|------------------|
| 850   | 45    | R.RSLSELADPNPK.V |

**EZRI\_HUMAN** Mass: 69412 **Score: 42** Matches: 1(1) Sequences: 1(1) emPAI: 0.06  
Ezrin OS=Homo sapiens GN=EZR PE=1 SV=4

| Query | Score | Peptide       |
|-------|-------|---------------|
| 500   | 42    | K.IGFPWSEIR.N |

**H2A1B\_HUMAN** Mass: 14135 **Score: 42** Matches: 1(1) Sequences: 1(1) emPAI: 0.32  
Histone H2A type 1-B/E OS=Homo sapiens GN=HIST1H2AB PE=1 SV=2

| Query | Score | Peptide                 |
|-------|-------|-------------------------|
| 1516  | 42    | R.VTIAQGGVLPNIQAVLLPK.K |

**RNF17\_HUMAN** Mass: 184641 **Score: 41** Matches: 1(1) Sequences: 1(1) emPAI: 0.02  
RING finger protein 17 OS=Homo sapiens GN=RNF17 PE=1 SV=3

| Query | Score | Peptide          |
|-------|-------|------------------|
| 863   | 41    | K.KNNLNAAMNIAR.A |

**AT1B1\_HUMAN** Mass: 35061 **Score: 40** Matches: 1(1) Sequences: 1(1) emPAI: 0.12  
Sodium/potassium-transporting ATPase subunit beta-1 OS=Homo sapiens GN=ATP1B1 PE=1 SV=1

| Query | Score | Peptide            |
|-------|-------|--------------------|
| 978   | 40    | R.VAPPGLTQIPQIQK.T |

**PGK1\_HUMAN** Mass: 44614 **Score: 40** Matches: 1(1) Sequences: 1(1) emPAI: 0.10  
Phosphoglycerate kinase 1 OS=Homo sapiens GN=PGK1 PE=1 SV=3

| Query | Score | Peptide             |
|-------|-------|---------------------|
| 1160  | 40    | K.LGDVYVNDAFGTAHR.A |

Proteins matching the same set of peptides:

**PGK2\_HUMAN** Mass: 44796 **Score: 40** Matches: 1(1) Sequences: 1(1)  
Phosphoglycerate kinase 2 OS=Homo sapiens GN=PGK2 PE=1 SV=3

**NQO1\_HUMAN** Mass: 30867 **Score: 40** Matches: 1(1) Sequences: 1(1) emPAI: 0.14  
NAD(P)H dehydrogenase [quinone] 1 OS=Homo sapiens GN=NQO1 PE=1 SV=1

| Query | Score | Peptide        |
|-------|-------|----------------|
| 503   | 40    | R.ALIVLAHSER.T |

**C1TC\_HUMAN** Mass: 101558 **Score: 39** Matches: 1(1) Sequences: 1(1) emPAI: 0.04

C-1-tetrahydrofolate synthase, cytoplasmic OS=Homo sapiens GN=MTHFD1 PE=1 SV=3

| Query | Score | Peptide         |
|-------|-------|-----------------|
| 660   | 39    | K.TPVPSDIDISR.S |

**H2AV\_HUMAN** Mass: 13509 **Score: 39** Matches: 1(1) Sequences: 1(1) emPAI: 0.34

Histone H2A.V OS=Homo sapiens GN=H2AFV PE=1 SV=3

| Query | Score | Peptide         |
|-------|-------|-----------------|
| 512   | 39    | R.GDEELDSLIIK.A |

Proteins matching the same set of peptides:

H2AZ\_HUMAN Mass: 13553 **Score: 39** Matches: 1(1) Sequences: 1(1)

Histone H2A.Z OS=Homo sapiens GN=H2AFZ PE=1 SV=2

**FAS\_HUMAN** Mass: 273423 **Score: 39** Matches: 2(1) Sequences: 2(1) emPAI: 0.02

Fatty acid synthase OS=Homo sapiens GN=FASN PE=1 SV=3

| Query | Score | Peptide         |
|-------|-------|-----------------|
| 439   | 39    | K.AQVADVVSRSR.W |
| 643   | 38    | R.SDEAVKPFGLK.V |

**RL22\_HUMAN** Mass: 14787 **Score: 38** Matches: 1(1) Sequences: 1(1) emPAI: 0.31

60S ribosomal protein L22 OS=Homo sapiens GN=RPL22 PE=1 SV=2

| Query | Score | Peptide         |
|-------|-------|-----------------|
| 672   | 38    | K.ITVTSEVPFSK.R |

**GBLP\_HUMAN** Mass: 35076 **Score: 38** Matches: 1(1) Sequences: 1(1) emPAI: 0.12

Guanine nucleotide-binding protein subunit beta-2-like 1 OS=Homo sapiens GN=GNB2L1 PE=1 SV=3

| Query | Score | Peptide              |
|-------|-------|----------------------|
| 1357  | 38    | K.IIVDELKQEVISTSSK.A |
